# Supplementary material for: A 3D-printed integrated MXene-based evaporator with a vertical array structure for salt-resistant solar desalination
Source: Royal Society of Chemistry journal article supplement (doi:10.1039/d1ta07225k), 2021-01-01
Supplement: d1ta07225k2.pdf [file d1ta07225k2.pdf]

**Electronic Supplementary Material (ESI) for Journal of Materials Chemistry A.**

**This journal is © The Royal Society of Chemistry 2021**

Supporting Information

**3D-printed integrated MXene-based evaporator with vertical array  
structure for salt-resistant solar desalination†**

Yi Yang,<sup>a</sup> Wei Fan,<sup>\*a</sup> Shijia Yuan,<sup>a</sup> Jing Tian,<sup>a</sup> Guojie Chao,<sup>b</sup> Tianxi Liu<sup>\*ab</sup>

<sup>a</sup> State Key Laboratory for Modification of Chemical Fibers and Polymer Materials  
College of Materials Science and Engineering, Donghua University, Shanghai 201620,  
P. R. China, E-mail: weifan@dhu.edu.cn (W. Fan), txliu@fudan.edu.cn or  
txliu@dhu.edu.cn (T. Liu)

<sup>b</sup> Key Laboratory of Synthetic and Biological Colloids, Ministry of Education, School  
of Chemical and Material Engineering, Jiangnan University, Wuxi 214122, P. R. China

## **Table of contents**

**1. Fig. S1-S11**

**2. Movie S1**

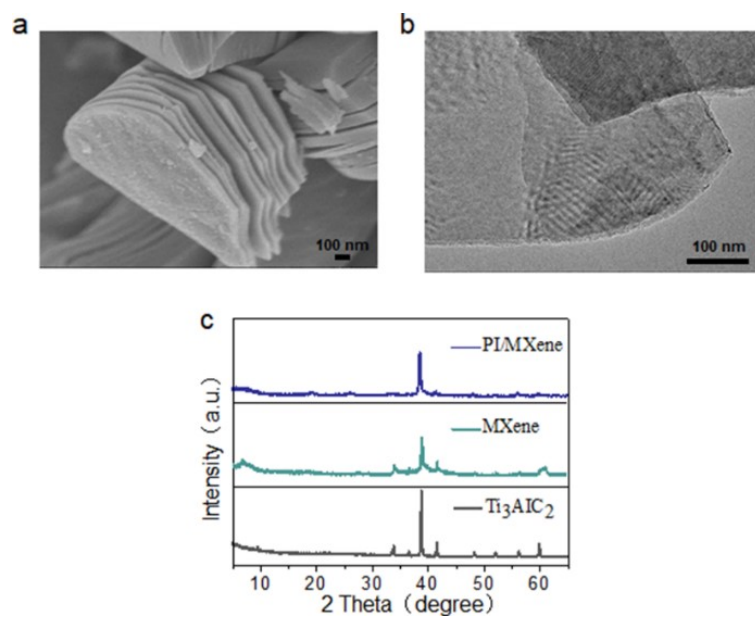

**Fig. S1.** a) SEM image of multi-layered MXene. b) TEM image of few-layered MXene. c) XRD patterns of  $\text{Ti}_3\text{AlC}_2$ , MXene, and PI/MXene.

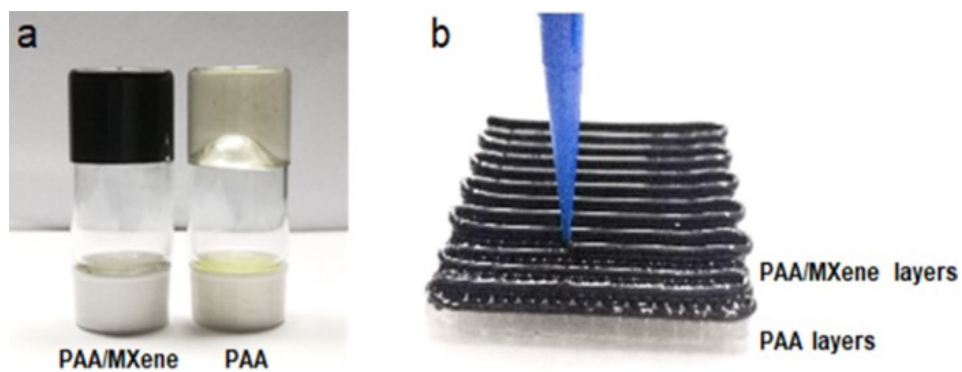

**Fig. S2.** a) Digital image of PAA/MXene and PAA inks. b) Digital image of 3D printing process.

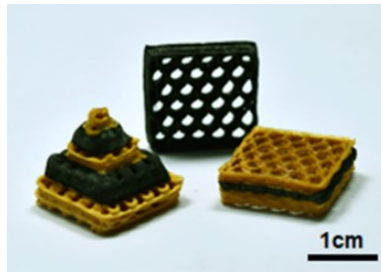

**Fig. S3.** PI/PIM aerogels with different macrostructure: pyramid and honeycomb.

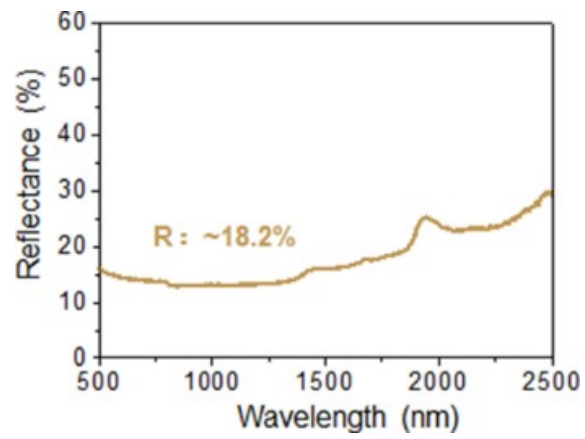

**Fig. S4.** The reflectance spectra of PIM aerogel with arrayless structure.

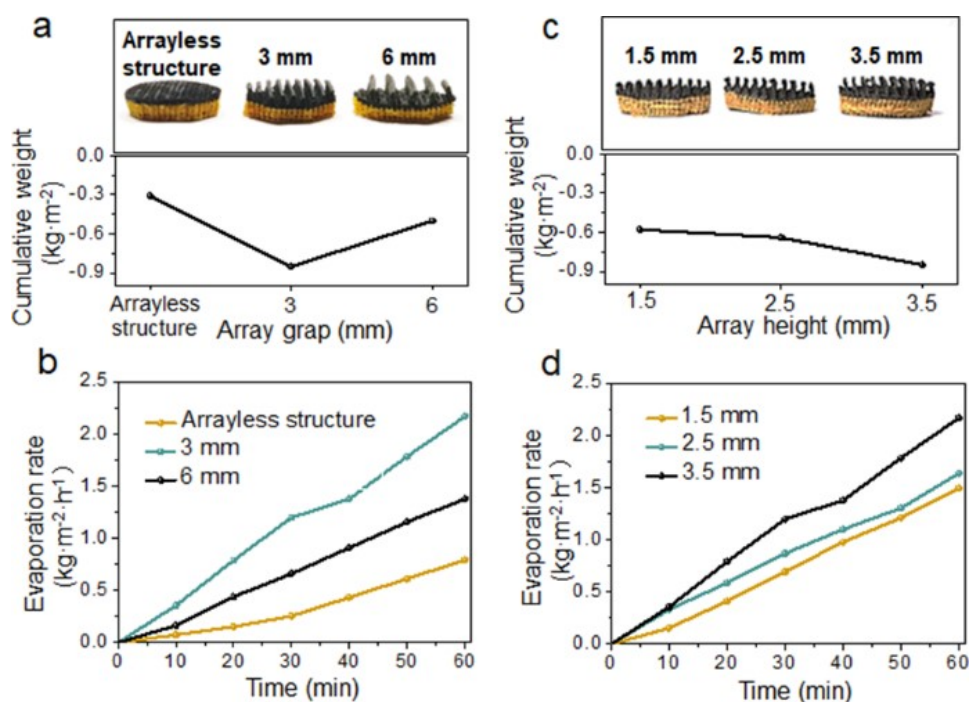

**Fig. S5** (a) The cumulative weight loss and (b) the water evaporation rates of 3D evaporator with different array gaps under 1 sun illumination. (c) The cumulative weight loss and (d) the water evaporation rates of 3D evaporator with different array heights under 1 sun illumination.

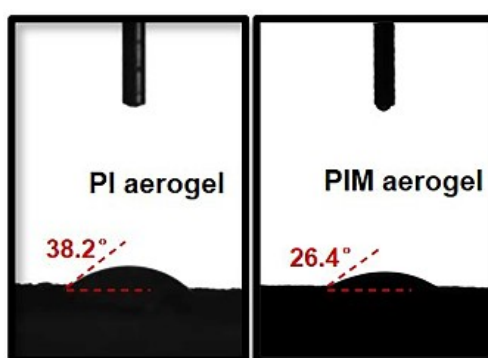

**Fig. S6.** The surface contact angle of PI and PIM aerogel in simulated seawater (NaCl solution, 20wt%) after surface plasma treatment.

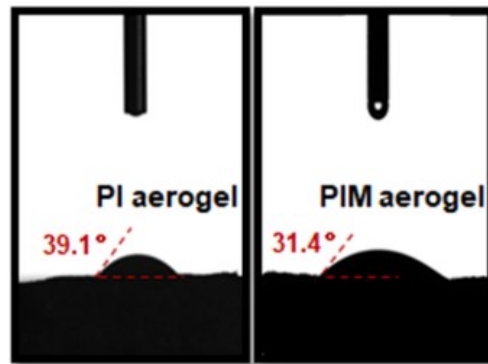

**Fig. S7.** The surface contact angle of PI and PIM aerogel in dyed water after surface plasma treatment.

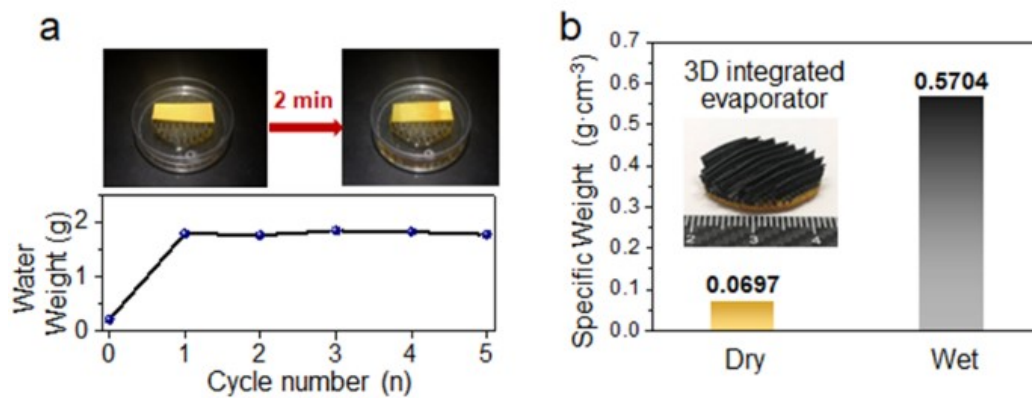

**Fig. S8.** a) Digital image of the 3D integrated evaporator adsorbing water and the weight change of the evaporator after water adsorption. b) Specific weight change of the 3D integrated evaporator when it is fully saturated with water.

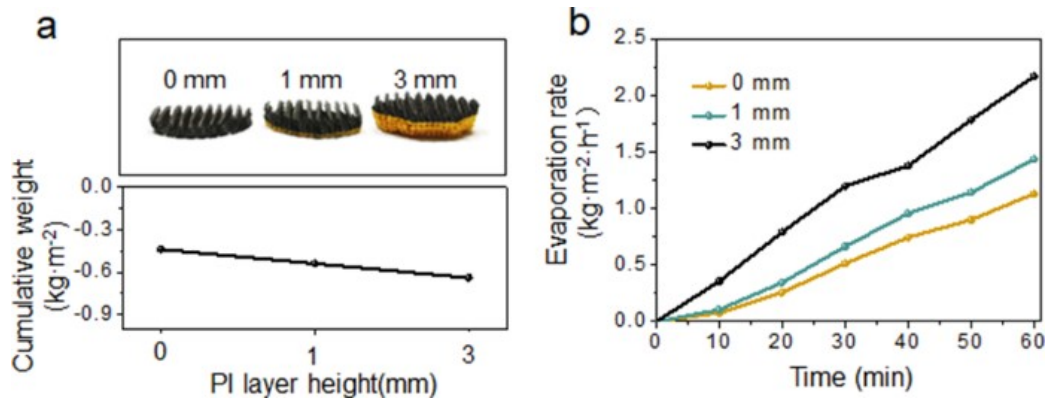

**Fig. S9.** a) The cumulative weight loss and b) water evaporation rates of 3D integrated evaporator with lattice structure of different heights under 1 sun illumination.

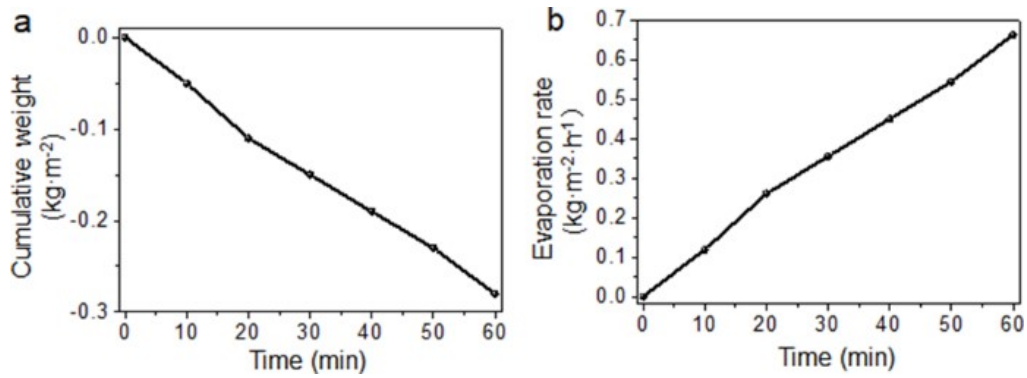

**Fig. S10.** a) The curve shows weight change of the 3D integrated evaporator at dark field. b) The curve shows evaporation rate of the 3D integrated evaporator at dark field.

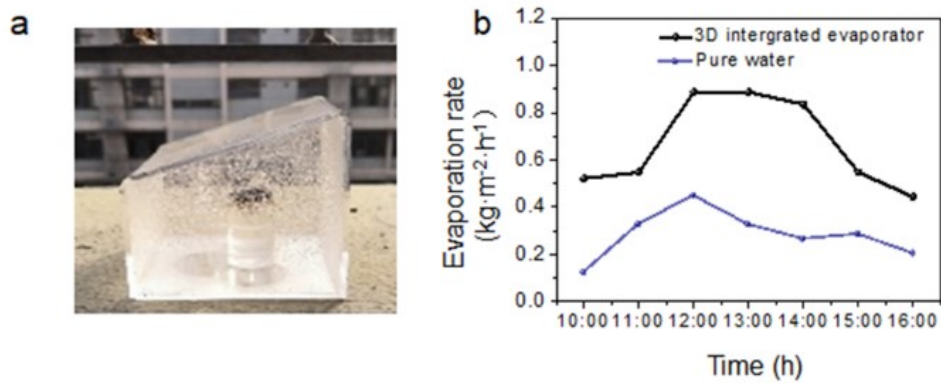

**Fig. S11.** The evaporation rate of 3D integrated evaporator and pure water in the actual environment, which recorded from 9:00 am to 16:00 pm, 24 December 2020, Shanghai, China.

**Movie S1:** Water transport process of PI aerogel strips with lattice structure in dyed seawater (NaCl solution, 20 wt%).
